# Supplementary material for: Influence of temperature and CO 2 on the strontium and magnesium composition of coccolithophore calcite
Source: Copernicus journal article supplement (doi:10.5194/bg-11-1065-2014), 2014-02-25
Supplement: Supplementary file 1 [file bg-11-1065-2014-supplement.pdf]

Supplementary Table 1: Carbonate system parameters (calculated from the start and end values of DIC and TA) of the four individual experiments with corresponding experimental conditions. Values are expressed as the mean with corresponding standard deviation ( $\pm 1SD$ ).

| <b>Experiment 1:</b> North Sea water, salinity = 34, light = 180 $\mu\text{mol photons m}^{-2} \text{ s}^{-1}$ , light:dark = 14 : 10 h, replicates = 3 |         |                                     |                   |                 |                                |                               |                 |                                                          |                               |
|---------------------------------------------------------------------------------------------------------------------------------------------------------|---------|-------------------------------------|-------------------|-----------------|--------------------------------|-------------------------------|-----------------|----------------------------------------------------------|-------------------------------|
| Seawater Sr/Ca = 8.42 $\pm$ 0.30, Mg/Ca = 5.29 $\pm$ 0.15                                                                                               |         |                                     |                   |                 |                                |                               |                 |                                                          |                               |
| Species                                                                                                                                                 | T<br>°C | pCO <sub>2</sub><br>$\mu\text{atm}$ | pH<br>total scale | $\Omega$        | DIC<br>$\mu\text{mol kg}^{-1}$ | TA<br>$\mu\text{mol kg}^{-1}$ | CO <sub>2</sub> | HCO <sub>3</sub> <sup>-</sup><br>$\mu\text{mol kg}^{-1}$ | CO <sub>3</sub> <sup>2-</sup> |
| <i>C. braarudii</i>                                                                                                                                     | 10      | 417 $\pm$ 15                        | 8.04 $\pm$ 0.03   | 3.29 $\pm$ 0.38 | 2139 $\pm$ 19                  | 2322 $\pm$ 9                  | 18 $\pm$ 1      | 1984 $\pm$ 33                                            | 137 $\pm$ 16                  |
| <i>C. braarudii</i>                                                                                                                                     | 15      | 320 $\pm$ 17                        | 8.15 $\pm$ 0.02   | 5.00 $\pm$ 0.18 | 2107 $\pm$ 8                   | 2393 $\pm$ 5                  | 12 $\pm$ 1      | 1887 $\pm$ 15                                            | 208 $\pm$ 8                   |
| <i>C. braarudii</i>                                                                                                                                     | 18      | 501 $\pm$ 30                        | 7.99 $\pm$ 0.02   | 4.12 $\pm$ 0.17 | 2182 $\pm$ 8                   | 2408 $\pm$ 7                  | 17 $\pm$ 1      | 1993 $\pm$ 13                                            | 172 $\pm$ 7                   |
| <i>C. quadriperforatus</i>                                                                                                                              | 15      | 308 $\pm$ 2                         | 8.17 $\pm$ 0.01   | 5.33 $\pm$ 0.03 | 2149 $\pm$ 2                   | 2453 $\pm$ 2                  | 12 $\pm$ 1      | 1915 $\pm$ 2                                             | 222 $\pm$ 1                   |
| <i>C. quadriperforatus</i>                                                                                                                              | 18      | 451 $\pm$ 45                        | 8.04 $\pm$ 0.03   | 4.66 $\pm$ 0.24 | 2221 $\pm$ 8                   | 2478 $\pm$ 7                  | 16 $\pm$ 2      | 2012 $\pm$ 17                                            | 194 $\pm$ 10                  |
| <i>C. quadriperforatus</i>                                                                                                                              | 20      | 316 $\pm$ 46                        | 8.15 $\pm$ 0.03   | 4.10 $\pm$ 0.23 | 2115 $\pm$ 7                   | 2351 $\pm$ 17                 | 14 $\pm$ 1      | 1930 $\pm$ 10                                            | 171 $\pm$ 9                   |
| <i>E. huxleyi</i>                                                                                                                                       | 10      | 276 $\pm$ 6                         | 8.21 $\pm$ 0.01   | 4.75 $\pm$ 0.26 | 2151 $\pm$ 13                  | 2425 $\pm$ 6                  | 12 $\pm$ 1      | 1941 $\pm$ 19                                            | 198 $\pm$ 7                   |
| <i>E. huxleyi</i>                                                                                                                                       | 15      | 306 $\pm$ 5                         | 8.17 $\pm$ 0.01   | 5.30 $\pm$ 0.05 | 2133 $\pm$ 3                   | 2436 $\pm$ 1                  | 12 $\pm$ 1      | 1901 $\pm$ 5                                             | 221 $\pm$ 2                   |
| <i>E. huxleyi</i>                                                                                                                                       | 20      | 400 $\pm$ 41                        | 8.07 $\pm$ 0.03   | 5.15 $\pm$ 0.27 | 2126 $\pm$ 5                   | 2415 $\pm$ 12                 | 13 $\pm$ 1      | 1899 $\pm$ 15                                            | 214 $\pm$ 11                  |
| <i>E. huxleyi</i>                                                                                                                                       | 25      | 427 $\pm$ 30                        | 8.05 $\pm$ 0.03   | 5.97 $\pm$ 0.31 | 2140 $\pm$ 10                  | 2470 $\pm$ 14                 | 12 $\pm$ 1      | 1882 $\pm$ 20                                            | 246 $\pm$ 13                  |
| <b>Experiment 2:</b> North Sea water, salinity = 34, light = 130 $\mu\text{mol photons m}^{-2} \text{ s}^{-1}$ , light:dark = 14 : 10 h, replicates = 2 |         |                                     |                   |                 |                                |                               |                 |                                                          |                               |
| Seawater Sr/Ca = 8.42 $\pm$ 0.30, Mg/Ca = 5.29 $\pm$ 0.15                                                                                               |         |                                     |                   |                 |                                |                               |                 |                                                          |                               |
| Species                                                                                                                                                 | T<br>°C | pCO <sub>2</sub><br>$\mu\text{atm}$ | pH<br>total scale | $\Omega$        | DIC<br>$\mu\text{mol kg}^{-1}$ | TA<br>$\mu\text{mol kg}^{-1}$ | CO <sub>2</sub> | HCO <sub>3</sub> <sup>-</sup><br>$\mu\text{mol kg}^{-1}$ | CO <sub>3</sub> <sup>2-</sup> |
| <i>E. huxleyi</i>                                                                                                                                       | 10      | 193 $\pm$ 3                         | 8.35 $\pm$ 0.01   | 6.36 $\pm$ 0.07 | 2150 $\pm$ 1                   | 2520 $\pm$ 3                  | 9 $\pm$ 1       | 1876 $\pm$ 4                                             | 265 $\pm$ 3                   |
| <i>E. huxleyi</i>                                                                                                                                       | 10      | 467 $\pm$ 9                         | 7.99 $\pm$ 0.01   | 2.99 $\pm$ 0.06 | 2148 $\pm$ 1                   | 2311 $\pm$ 3                  | 21 $\pm$ 1      | 2002 $\pm$ 2                                             | 125 $\pm$ 2                   |
| <i>E. huxleyi</i>                                                                                                                                       | 10      | 699 $\pm$ 5                         | 7.82 $\pm$ 0.01   | 2.05 $\pm$ 0.01 | 2143 $\pm$ 1                   | 2240 $\pm$ 1                  | 31 $\pm$ 1      | 2027 $\pm$ 1                                             | 85 $\pm$ 1                    |
| <i>E. huxleyi</i>                                                                                                                                       | 10      | 898 $\pm$ 24                        | 7.72 $\pm$ 0.01   | 1.60 $\pm$ 0.04 | 2138 $\pm$ 1                   | 2199 $\pm$ 2                  | 39 $\pm$ 1      | 2032 $\pm$ 2                                             | 67 $\pm$ 2                    |
| <i>E. huxleyi</i>                                                                                                                                       | 10      | 1238 $\pm$ 23                       | 7.58 $\pm$ 0.01   | 1.16 $\pm$ 0.02 | 2131 $\pm$ 1                   | 2150 $\pm$ 2                  | 54 $\pm$ 1      | 2028 $\pm$ 1                                             | 48 $\pm$ 1                    |

|                   |    |           |             |             |          |          |        |          |         |
|-------------------|----|-----------|-------------|-------------|----------|----------|--------|----------|---------|
| <i>E. huxleyi</i> | 20 | 175 ± 1   | 8.39 ± 0.01 | 9.76 ± 0.01 | 2139 ± 1 | 2689 ± 1 | 6 ± 1  | 1728 ± 1 | 405 ± 1 |
| <i>E. huxleyi</i> | 20 | 365 ± 4   | 8.11 ± 0.01 | 5.60 ± 0.05 | 2135 ± 1 | 2449 ± 3 | 12 ± 1 | 1891 ± 1 | 232 ± 2 |
| <i>E. huxleyi</i> | 20 | 690 ± 12  | 7.85 ± 0.01 | 3.24 ± 0.04 | 2135 ± 1 | 2305 ± 3 | 22 ± 1 | 1978 ± 2 | 135 ± 2 |
| <i>E. huxleyi</i> | 20 | 812 ± 20  | 7.78 ± 0.01 | 2.76 ± 0.05 | 2118 ± 3 | 2257 ± 1 | 26 ± 1 | 1978 ± 5 | 114 ± 2 |
| <i>E. huxleyi</i> | 20 | 1106 ± 12 | 7.65 ± 0.01 | 2.08 ± 0.01 | 2128 ± 2 | 2217 ± 1 | 36 ± 1 | 2006 ± 2 | 86 ± 1  |

**Experiment 3:** North Sea water, salinity = 34, light = 130  $\mu\text{mol photons m}^{-2} \text{ s}^{-1}$ , light:dark = 16 : 08 h, replicates = 3

Seawater Sr/Ca = 8.42 ± 0.30, Mg/Ca = 5.29 ± 0.15

| Species             | T<br>°C | pCO <sub>2</sub><br>$\mu\text{atm}$ | pH<br>total scale | $\Omega$    | DIC<br>$\mu\text{mol kg}^{-1}$ | TA<br>$\mu\text{mol kg}^{-1}$ | CO <sub>2</sub> | HCO <sub>3</sub> <sup>-</sup><br>$\mu\text{mol kg}^{-1}$ | CO <sub>3</sub> <sup>2-</sup> |
|---------------------|---------|-------------------------------------|-------------------|-------------|--------------------------------|-------------------------------|-----------------|----------------------------------------------------------|-------------------------------|
| <i>C. braarudii</i> | 17      | 524 ± 27                            | 7.95 ± 0.02       | 3.33 ± 0.12 | 2056 ± 7                       | 2242 ± 6                      | 18 ± 1          | 1899 ± 11                                                | 139 ± 6                       |
| <i>C. braarudii</i> | 17      | 1151 ± 130                          | 7.61 ± 0.05       | 1.57 ± 0.21 | 2046 ± 21                      | 2105 ± 29                     | 41 ± 5          | 1939 ± 19                                                | 66 ± 8                        |
| <i>C. braarudii</i> | 17      | 1799 ± 257                          | 7.42 ± 0.06       | 1.00 ± 0.10 | 2037 ± 28                      | 2038 ± 16                     | 63 ± 9          | 1931 ± 25                                                | 42 ± 5                        |
| <i>C. braarudii</i> | 17      | 2311 ± 122                          | 7.31 ± 0.02       | 0.80 ± 0.01 | 2052 ± 18                      | 2021 ± 12                     | 81 ± 4          | 1938 ± 15                                                | 33 ± 1                        |
| <i>C. braarudii</i> | 17      | 3508 ± 172                          | 7.12 ± 0.02       | 0.50 ± 0.01 | 2034 ± 8                       | 1943 ± 3                      | 123 ± 6         | 1890 ± 4                                                 | 21 ± 1                        |

**Experiment 4:** Artificial sea water, salinity = 35, light = 150  $\mu\text{mol photons m}^{-2} \text{ s}^{-1}$ , light:dark = 16 : 08 h, replicates = 1

Seawater Sr/Ca = 9.66 ± 0.21, Mg/Ca = 5.43 ± 0.13

| Species            | T<br>°C | pCO <sub>2</sub><br>$\mu\text{atm}$ | pH<br>free scale | $\Omega$ | DIC<br>$\mu\text{mol kg}^{-1}$ | TA<br>$\mu\text{mol kg}^{-1}$ | CO <sub>2</sub> | HCO <sub>3</sub> <sup>-</sup><br>$\mu\text{mol kg}^{-1}$ | CO <sub>3</sub> <sup>2-</sup> |
|--------------------|---------|-------------------------------------|------------------|----------|--------------------------------|-------------------------------|-----------------|----------------------------------------------------------|-------------------------------|
| <i>G. oceanica</i> | 20      | 25                                  | 8.90             | 14.83    | 1421                           | 2340                          | 1               | 800                                                      | 620                           |
| <i>G. oceanica</i> | 20      | 59                                  | 8.66             | 11.64    | 1581                           | 2296                          | 2               | 1092                                                     | 487                           |
| <i>G. oceanica</i> | 20      | 108                                 | 8.48             | 9.35     | 1719                           | 2288                          | 4               | 1324                                                     | 391                           |
| <i>G. oceanica</i> | 20      | 280                                 | 8.17             | 5.88     | 1942                           | 2291                          | 9               | 1687                                                     | 246                           |
| <i>G. oceanica</i> | 20      | 413                                 | 8.04             | 4.58     | 2014                           | 2280                          | 13              | 1809                                                     | 192                           |
| <i>G. oceanica</i> | 20      | 574                                 | 7.91             | 3.63     | 2065                           | 2268                          | 19              | 1895                                                     | 152                           |
| <i>G. oceanica</i> | 20      | 764                                 | 7.81             | 2.95     | 2122                           | 2278                          | 25              | 1974                                                     | 123                           |

|                    |    |      |      |       |      |      |     |      |     |
|--------------------|----|------|------|-------|------|------|-----|------|-----|
| <i>G. oceanica</i> | 20 | 940  | 7.73 | 2.57  | 2182 | 2309 | 30  | 2044 | 108 |
| <i>G. oceanica</i> | 20 | 1216 | 7.63 | 2.06  | 2209 | 2296 | 39  | 2083 | 86  |
| <i>G. oceanica</i> | 20 | 1476 | 7.55 | 1.77  | 2246 | 2307 | 48  | 2125 | 74  |
| <i>G. oceanica</i> | 20 | 1781 | 7.48 | 1.50  | 2268 | 2303 | 58  | 2148 | 63  |
| <i>G. oceanica</i> | 20 | 2104 | 7.41 | 1.30  | 2301 | 2314 | 68  | 2179 | 55  |
| <i>G. oceanica</i> | 25 | 26   | 8.85 | 14.72 | 1335 | 2262 | 1   | 723  | 611 |
| <i>G. oceanica</i> | 25 | 58   | 8.65 | 13.25 | 1583 | 2385 | 2   | 1031 | 550 |
| <i>G. oceanica</i> | 25 | 288  | 8.15 | 6.50  | 1883 | 2267 | 8   | 1605 | 270 |
| <i>G. oceanica</i> | 25 | 318  | 8.23 | 6.15  | 1905 | 2267 | 9   | 1640 | 255 |
| <i>G. oceanica</i> | 25 | 447  | 8.11 | 5.10  | 1996 | 2290 | 13  | 1772 | 212 |
| <i>G. oceanica</i> | 25 | 612  | 8.00 | 4.11  | 2049 | 2279 | 17  | 1861 | 171 |
| <i>G. oceanica</i> | 25 | 771  | 7.91 | 3.52  | 2103 | 2293 | 22  | 1934 | 146 |
| <i>G. oceanica</i> | 25 | 980  | 7.71 | 2.88  | 2118 | 2264 | 28  | 1970 | 120 |
| <i>G. oceanica</i> | 25 | 1284 | 7.60 | 2.29  | 2139 | 2242 | 36  | 2007 | 95  |
| <i>G. oceanica</i> | 25 | 1731 | 7.48 | 1.79  | 2188 | 2248 | 49  | 2064 | 74  |
| <i>G. oceanica</i> | 25 | 2067 | 7.41 | 1.52  | 2193 | 2227 | 59  | 2071 | 63  |
| <i>G. oceanica</i> | 25 | 3517 | 7.15 | 0.78  | 2067 | 2018 | 100 | 1935 | 32  |

---

Supplementary Table 2: Physiological parameters of the four individual experiments with corresponding experimental conditions. Values are expressed as the mean with corresponding standard deviation ( $\pm 1SD$ ).

| <b>Experiment 1:</b> North Sea water, salinity = 34, light = 180 $\mu\text{mol photons m}^{-2} \text{ s}^{-1}$ , light:dark = 14 : 10 h, replicates = 3 |         |                                     |                                |                                                              |                                                              |                                                              |                                                                  |                    |                  |
|---------------------------------------------------------------------------------------------------------------------------------------------------------|---------|-------------------------------------|--------------------------------|--------------------------------------------------------------|--------------------------------------------------------------|--------------------------------------------------------------|------------------------------------------------------------------|--------------------|------------------|
| Seawater Sr/Ca = 8.42 $\pm$ 0.30, Mg/Ca = 5.29 $\pm$ 0.15                                                                                               |         |                                     |                                |                                                              |                                                              |                                                              |                                                                  |                    |                  |
| Species                                                                                                                                                 | T<br>°C | pCO <sub>2</sub><br>$\mu\text{atm}$ | growth rate<br>$\text{d}^{-1}$ | POC <sub>prod</sub><br>$\text{pgC cell}^{-1}\text{day}^{-1}$ | PIC <sub>prod</sub><br>$\text{pgC cell}^{-1}\text{day}^{-1}$ | TPN <sub>prod</sub><br>$\text{pgN cell}^{-1}\text{day}^{-1}$ | Chla <sub>prod</sub><br>$\text{pgChla cell}^{-1}\text{day}^{-1}$ | PIC:POC<br>mol/mol | POC:TPN          |
| <i>C. braarudii</i>                                                                                                                                     | 10      | 417 $\pm$ 15                        | 0.38 $\pm$ 0.01                | 149 $\pm$ 8                                                  | 75 $\pm$ 1                                                   | 18.8 $\pm$ 1.1                                               | 2.33 $\pm$ 0.22                                                  | 0.50 $\pm$ 0.03    | 9.27 $\pm$ 0.37  |
| <i>C. braarudii</i>                                                                                                                                     | 15      | 320 $\pm$ 17                        | 0.52 $\pm$ 0.01                | 155 $\pm$ 6                                                  | 120 $\pm$ 10                                                 | 16.0 $\pm$ 0.1                                               | 4.07 $\pm$ 0.42                                                  | 0.78 $\pm$ 0.09    | 11.25 $\pm$ 0.45 |
| <i>C. braarudii</i>                                                                                                                                     | 18      | 501 $\pm$ 30                        | 0.56 $\pm$ 0.01                | 205 $\pm$ 5                                                  | 137 $\pm$ 6                                                  | 20.2 $\pm$ 0.3                                               | 5.43 $\pm$ 0.22                                                  | 0.67 $\pm$ 0.04    | 11.84 $\pm$ 0.14 |
| <i>C. quadriperforatus</i>                                                                                                                              | 15      | 308 $\pm$ 2                         | 0.51 $\pm$ 0.01                | 28.6 $\pm$ 2.4                                               | 40.9 $\pm$ 0.7                                               | 7.84 $\pm$ 1.44                                              | 0.91 $\pm$ 0.37                                                  | 1.43 $\pm$ 0.12    | 4.31 $\pm$ 0.52  |
| <i>C. quadriperforatus</i>                                                                                                                              | 18      | 451 $\pm$ 45                        | 0.54 $\pm$ 0.01                | 44.9 $\pm$ 7.2                                               | 54.4 $\pm$ 6.1                                               | 5.10 $\pm$ 0.53                                              | 0.44 $\pm$ 0.12                                                  | 1.23 $\pm$ 0.24    | 10.25 $\pm$ 1.21 |
| <i>C. quadriperforatus</i>                                                                                                                              | 20      | 316 $\pm$ 46                        | 0.64 $\pm$ 0.01                | 55.8 $\pm$ 1.1                                               | 72.8 $\pm$ 1.1                                               | 5.92 $\pm$ 0.06                                              | 1.16 $\pm$ 0.06                                                  | 1.31 $\pm$ 0.01    | 10.99 $\pm$ 0.13 |
| <i>E. huxleyi</i>                                                                                                                                       | 10      | 276 $\pm$ 6                         | 0.53 $\pm$ 0.01                | 12.2 $\pm$ 0.52                                              | 5.81 $\pm$ 0.17                                              | 2.21 $\pm$ 0.13                                              | 0.59 $\pm$ 0.02                                                  | 0.48 $\pm$ 0.01    | 6.43 $\pm$ 0.09  |
| <i>E. huxleyi</i>                                                                                                                                       | 15      | 306 $\pm$ 5                         | 1.03 $\pm$ 0.01                | 8.21 $\pm$ 0.06                                              | 6.27 $\pm$ 0.16                                              | 1.42 $\pm$ 0.09                                              | 0.27 $\pm$ 0.01                                                  | 0.76 $\pm$ 0.01    | 6.76 $\pm$ 0.47  |
| <i>E. huxleyi</i>                                                                                                                                       | 20      | 400 $\pm$ 41                        | 1.24 $\pm$ 0.01                | 5.56 $\pm$ 0.04                                              | 5.05 $\pm$ 0.04                                              | 0.96 $\pm$ 0.01                                              | 0.22 $\pm$ 0.01                                                  | 0.91 $\pm$ 0.01    | 6.75 $\pm$ 0.07  |
| <i>E. huxleyi</i>                                                                                                                                       | 25      | 427 $\pm$ 30                        | 1.34 $\pm$ 0.01                | 7.31 $\pm$ 0.16                                              | 7.72 $\pm$ 0.19                                              | 1.11 $\pm$ 0.06                                              | 0.27 $\pm$ 0.01                                                  | 1.06 $\pm$ 0.01    | 7.66 $\pm$ 0.42  |
| <b>Experiment 2:</b> North Sea water, salinity = 34, light = 130 $\mu\text{mol photons m}^{-2} \text{ s}^{-1}$ , light:dark = 14 : 10 h, replicates = 2 |         |                                     |                                |                                                              |                                                              |                                                              |                                                                  |                    |                  |
| Seawater Sr/Ca = 8.42 $\pm$ 0.30, Mg/Ca = 5.29 $\pm$ 0.15                                                                                               |         |                                     |                                |                                                              |                                                              |                                                              |                                                                  |                    |                  |
| Species                                                                                                                                                 | T<br>°C | pCO <sub>2</sub><br>$\mu\text{atm}$ | growth rate<br>$\text{d}^{-1}$ | POC <sub>prod</sub><br>$\text{pgC cell}^{-1}\text{day}^{-1}$ | PIC <sub>prod</sub><br>$\text{pgC cell}^{-1}\text{day}^{-1}$ | TPN <sub>prod</sub><br>$\text{pgN cell}^{-1}\text{day}^{-1}$ | Chla <sub>prod</sub><br>$\text{pgChla cell}^{-1}\text{day}^{-1}$ | PIC:POC<br>mol/mol | POC:TPN          |
| <i>E. huxleyi</i>                                                                                                                                       | 10      | 193 $\pm$ 3                         | 0.64 $\pm$ 0.01                | 5.78 $\pm$ 0.53                                              | 8.10 $\pm$ 0.70                                              | 0.87 $\pm$ 0.06                                              | 0.07 $\pm$ 0.01                                                  | 1.40 $\pm$ 0.01    | 7.81 $\pm$ 1.27  |
| <i>E. huxleyi</i>                                                                                                                                       | 10      | 467 $\pm$ 9                         | 0.65 $\pm$ 0.01                | 5.48 $\pm$ 0.07                                              | 8.21 $\pm$ 0.25                                              | 0.79 $\pm$ 0.03                                              | 0.07 $\pm$ 0.01                                                  | 1.50 $\pm$ 0.03    | 8.09 $\pm$ 0.36  |
| <i>E. huxleyi</i>                                                                                                                                       | 10      | 699 $\pm$ 5                         | 0.63 $\pm$ 0.01                | 5.33 $\pm$ 0.65                                              | 7.72 $\pm$ 0.04                                              | 0.79 $\pm$ 0.06                                              | 0.07 $\pm$ 0.01                                                  | 1.46 $\pm$ 0.17    | 7.90 $\pm$ 0.40  |
| <i>E. huxleyi</i>                                                                                                                                       | 10      | 898 $\pm$ 24                        | 0.62 $\pm$ 0.01                | 5.13 $\pm$ 0.02                                              | 6.68 $\pm$ 0.54                                              | 0.73 $\pm$ 0.01                                              | 0.06 $\pm$ 0.01                                                  | 1.30 $\pm$ 0.10    | 8.17 $\pm$ 0.06  |
| <i>E. huxleyi</i>                                                                                                                                       | 10      | 1238 $\pm$ 23                       | 0.57 $\pm$ 0.01                | 5.11 $\pm$ 0.09                                              | 5.70 $\pm$ 0.77                                              | 0.69 $\pm$ 0.02                                              | 0.06 $\pm$ 0.01                                                  | 1.12 $\pm$ 0.17    | 8.59 $\pm$ 0.44  |

|                   |    |           |             |             |             |             |             |             |             |
|-------------------|----|-----------|-------------|-------------|-------------|-------------|-------------|-------------|-------------|
| <i>E. huxleyi</i> | 20 | 175 ± 1   | 1.34 ± 0.01 | 8.03 ± 1.21 | 7.50 ± 0.71 | 1.26 ± 0.13 | 0.10 ± 0.01 | 1.02 ± 0.14 | 6.85 ± 0.45 |
| <i>E. huxleyi</i> | 20 | 365 ± 4   | 1.41 ± 0.01 | 7.74 ± 0.56 | 6.70 ± 1.18 | 1.27 ± 0.04 | 0.13 ± 0.01 | 0.87 ± 0.22 | 7.11 ± 0.27 |
| <i>E. huxleyi</i> | 20 | 690 ± 12  | 1.35 ± 0.01 | 7.61 ± 0.30 | 6.08 ± 0.18 | 1.32 ± 0.12 | 0.13 ± 0.01 | 0.80 ± 0.06 | 6.74 ± 0.33 |
| <i>E. huxleyi</i> | 20 | 812 ± 20  | 1.31 ± 0.02 | 7.42 ± 0.22 | 5.02 ± 0.42 | 1.47 ± 0.24 | 0.12 ± 0.01 | 0.70 ± 0.05 | 5.80 ± 1.04 |
| <i>E. huxleyi</i> | 20 | 1106 ± 12 | 1.19 ± 0.03 | 8.14 ± 0.11 | 3.82 ± 0.29 | 1.55 ± 0.09 | 0.10 ± 0.01 | 0.47 ± 0.04 | 6.13 ± 0.29 |

**Experiment 3:** North Sea water, salinity = 34, light = 130  $\mu\text{mol photons m}^{-2} \text{s}^{-1}$ , light:dark = 16 : 08 h, replicates = 3

Seawater Sr/Ca = 8.42 ± 0.30, Mg/Ca = 5.29 ± 0.15

| Species             | T<br>°C | pCO <sub>2</sub><br>μatm | growth rate<br>d <sup>-1</sup> | POC <sub>prod</sub><br>pgC cell <sup>-1</sup> day <sup>-1</sup> | PIC <sub>prod</sub> | TPN <sub>prod</sub><br>pgN cell <sup>-1</sup> day <sup>-1</sup> | Chla <sub>prod</sub><br>pgChla cell <sup>-1</sup> day <sup>-1</sup> | PIC:POC<br>mol/mol | POC:TPN     |
|---------------------|---------|--------------------------|--------------------------------|-----------------------------------------------------------------|---------------------|-----------------------------------------------------------------|---------------------------------------------------------------------|--------------------|-------------|
| <i>C. braarudii</i> | 17      | 524 ± 27                 | 0.63 ± 0.06                    | 215 ± 14                                                        | 335 ± 24            | 24.5 ± 1.8                                                      | -                                                                   | 1.60 ± 0.17        | 8.33 ± 0.46 |
| <i>C. braarudii</i> | 17      | 1151 ± 130               | 0.57 ± 0.06                    | 289 ± 94                                                        | 346 ± 115           | 25.8 ± 9.2                                                      | -                                                                   | 1.37 ± 0.70        | 7.80 ± 0.78 |
| <i>C. braarudii</i> | 17      | 1799 ± 257               | 0.43 ± 0.06                    | 140 ± 6                                                         | 82 ± 39             | 5.6 ± 2.8                                                       | -                                                                   | 0.57 ± 0.31        | 9.40 ± 0.20 |
| <i>C. braarudii</i> | 17      | 2311 ± 122               | 0.13 ± 0.06                    | 89 ± 17                                                         | 22 ± 16             | 1.5 ± 1.4                                                       | -                                                                   | 0.27 ± 0.29        | 7.10 ± 0.70 |
| <i>C. braarudii</i> | 17      | 3508 ± 172               | 0.13 ± 0.06                    | 90 ± 54                                                         | 17 ± 11             | 1.3 ± 0.8                                                       | -                                                                   | 0.20 ± 0.01        | 7.67 ± 0.57 |

**Experiment 4:** Artificial sea water, salinity = 35, light = 150  $\mu\text{mol photons m}^{-2} \text{s}^{-1}$ , light:dark = 16 : 08 h, replicates = 1

Seawater Sr/Ca = 9.66 ± 0.22, Mg/Ca = 5.43 ± 0.14

| Species            | T<br>°C | pCO <sub>2</sub><br>μatm | growth rate<br>d <sup>-1</sup> | POC <sub>prod</sub><br>pgC cell <sup>-1</sup> day <sup>-1</sup> | PIC <sub>prod</sub> | TPN <sub>prod</sub><br>pgN cell <sup>-1</sup> day <sup>-1</sup> | Chla <sub>prod</sub><br>pgChla cell <sup>-1</sup> day <sup>-1</sup> | PIC:POC<br>mol/mol | POC:TPN |
|--------------------|---------|--------------------------|--------------------------------|-----------------------------------------------------------------|---------------------|-----------------------------------------------------------------|---------------------------------------------------------------------|--------------------|---------|
| <i>G. oceanica</i> | 20      | 25                       | 0.29                           | 5.6                                                             | 6.6                 | 1.24                                                            | 0.06                                                                | 1.18               | 5.23    |
| <i>G. oceanica</i> | 20      | 59                       | 0.54                           | 6.2                                                             | 13.4                | 0.53                                                            | 0.12                                                                | 2.17               | 13.65   |
| <i>G. oceanica</i> | 20      | 108                      | 0.82                           | 12.2                                                            | 24.6                | 0.94                                                            | 0.23                                                                | 2.02               | 15.16   |
| <i>G. oceanica</i> | 20      | 280                      | 1.00                           | 14.3                                                            | 26.0                | 1.14                                                            | 0.24                                                                | 1.81               | 14.68   |
| <i>G. oceanica</i> | 20      | 413                      | 1.06                           | 12.2                                                            | 21.0                | 0.97                                                            | 0.23                                                                | 1.73               | 14.70   |
| <i>G. oceanica</i> | 20      | 574                      | 1.05                           | 12.7                                                            | 20.3                | 1.01                                                            | 0.23                                                                | 1.59               | 14.74   |
| <i>G. oceanica</i> | 20      | 764                      | 0.88                           | 16.7                                                            | 19.7                | 1.18                                                            | 0.22                                                                | 1.18               | 16.46   |

|                    |    |      |      |      |      |      |      |      |       |
|--------------------|----|------|------|------|------|------|------|------|-------|
| <i>G. oceanica</i> | 20 | 940  | 0.79 | 13.7 | 15.9 | 1.18 | 0.16 | 1.16 | 13.63 |
| <i>G. oceanica</i> | 20 | 1216 | 0.58 | 9.0  | 9.0  | 1.54 | 0.08 | 1.00 | 6.76  |
| <i>G. oceanica</i> | 20 | 1476 | 0.51 | 8.2  | 8.1  | 1.41 | 0.08 | 0.99 | 6.77  |
| <i>G. oceanica</i> | 20 | 1781 | 0.44 | 7.1  | 6.0  | 1.20 | 0.05 | 0.84 | 6.95  |
| <i>G. oceanica</i> | 20 | 2104 | 0.36 | 7.6  | 7.8  | 0.76 | 0.06 | 1.02 | 11.65 |
| <i>G. oceanica</i> | 25 | 26   | 0.21 | 1.5  | 1.7  | 0.39 | 0.02 | 1.11 | 4.54  |
| <i>G. oceanica</i> | 25 | 58   | 0.47 | 4.0  | 7.5  | 0.91 | 0.06 | 1.85 | 5.19  |
| <i>G. oceanica</i> | 25 | 288  | 1.13 | 14.3 | 28.0 | 2.34 | 0.30 | 1.96 | 7.14  |
| <i>G. oceanica</i> | 25 | 318  | 1.13 | -    | -    | -    | -    | -    | -     |
| <i>G. oceanica</i> | 25 | 447  | 1.10 | -    | -    | -    | -    | -    | -     |
| <i>G. oceanica</i> | 25 | 612  | 1.11 | -    | -    | -    | -    | -    | -     |
| <i>G. oceanica</i> | 25 | 771  | 1.07 | -    | -    | -    | -    | -    | -     |
| <i>G. oceanica</i> | 25 | 980  | 1.15 | 12.2 | 18.4 | 2.05 | 0.18 | 1.51 | 6.92  |
| <i>G. oceanica</i> | 25 | 1284 | 0.99 | 14.5 | 19.0 | 2.56 | 0.22 | 1.31 | 6.62  |
| <i>G. oceanica</i> | 25 | 1731 | 0.85 | 11.3 | 12.0 | 2.08 | 0.15 | 1.07 | 6.30  |
| <i>G. oceanica</i> | 25 | 2067 | 0.61 | 11.0 | 10.4 | 1.75 | 0.10 | 0.95 | 7.32  |
| <i>G. oceanica</i> | 25 | 3517 | 0.69 | 10.4 | 10.7 | 1.73 | 0.12 | 1.02 | 7.02  |

---
